# 1 Hurricane-induced population decrease in a Critically Endangered long-lived reptile

2  
3 Matthijs P. van den Burg<sup>1,2,\*</sup>, Hannah Madden<sup>1,3,4,\*</sup>, Timothy P. van Wagensveld<sup>1,5</sup>, and Erik  
4 Boman<sup>6</sup>

5  
6 <sup>1</sup> IUCN SSC Iguana Specialist Group, Gland, Switzerland.  
7 <sup>2</sup> BioCoRe S. Coop. Calle Villagarcía 6, 28010, Madrid, Spain.  
8 <sup>3</sup> Caribbean Netherlands Science Institute, P.O. Box 65, St. Eustatius, Caribbean Netherlands.  
9 <sup>4</sup> NIOZ Royal Netherlands Institute for Sea Research, and Utrecht University, P.O. Box 59, 1790  
10 AB Den Burg, Texel, the Netherlands.  
11 <sup>5</sup> Reptile Amphibian Fish Research the Netherlands, Nijmegen, The Netherlands.  
12 <sup>6</sup> St. Eustatius National Park Foundation, St. Eustatius, Caribbean Netherlands.

13  
14 \* Joint first authors, email: [thijs.burg@gmail.com](mailto:thijs.burg@gmail.com), [hannah.madden@cnsi.nl](mailto:hannah.madden@cnsi.nl)  
15

## 16 ABSTRACT

17 Catastrophic events, like hurricanes, bring lethal conditions that can have population-altering  
18 effects. The threatened Caribbean dry forest occurs in a region known for its high-intensity  
19 hurricane seasons and high species endemism, highlighting the necessity to better understand  
20 hurricane impacts as fragmentation and clearing of natural habitat continues. However, such studies  
21 remain rare, and for reptiles are mostly restricted to *Anolis*. Here we used single-season occupancy  
22 modeling to infer the impact of the intense 2017 Atlantic hurricane season on the critically  
23 endangered Lesser Antillean Iguana, *Iguana delicatissima*. We surveyed 30 transects across eight  
24 habitats on St. Eustatius during 2017-2019, which resulted in 344 individual surveys and 98 iguana  
25 observations. Analyses of abundance and site occupancy indicated both measures for 2018 and  
26 2019 were strongly reduced compared to the pre-hurricane 2017 state. Iguanas at higher elevations  
27 were affected more profoundly, likely due to higher wind speeds, tree damage and extensive  
28 defoliation. Overall, our results indicate a decrease in population estimates (23.3-26.5%) and  
29 abundance (22-23.8%) for 2018 and 2019, and a 75% reduction in the number of opportunistic  
30 sightings of tagged iguanas between 2017-2018. As only small and isolated *I. delicatissima*  
31 populations remain, our study further demonstrates their vulnerability to stochastic events.  
32 Considering the frequency and intensity of hurricanes are projected to increase, our results stress the

33 urgent need for population-increasing conservation actions in order to secure the long-term survival  
34 of *I. delicatissima* throughout its range.

### 35 **Keywords**

36 Abundance, Caribbean, Detection probability, Disturbance event, Habitat, Hurricane, *Iguana*  
37 *delicatissima*, Monitoring, Site occupancy, St. Eustatius

38

### 39 **Introduction**

40 Hurricanes bring lethal conditions to populations in their path. These events can either directly  
41 affect natural populations, through e.g., mortality (Reagan 1991; Wiley and Wunderle 1993; Spiller  
42 et al. 1998; Behie and Pavelka 2005; Morcilo et al. 2020; Marroquin-Paramo et al. 2021), or  
43 indirectly e.g., when food presence and abundance is impacted (Cely 1991). Selective mortality  
44 sweeps have been shown to drive both evolution (Donihue et al. 2018) and community diversity  
45 (Johnson and Winker 2010; Meléndez-Vazquez et al. 2019). Additionally, catastrophic winds can  
46 aid dispersal of species (e.g., Censky et al. 1998). Although studies on the effects of hurricanes are  
47 rising given their projected increase (Webster et al. 2005), such studies are dependent on pre-  
48 hurricane data and hurricane trajectory, and are thus lacking for many species.

49 From a conservation perspective, the population-diminishing threat of hurricanes is  
50 especially of concern for closed island populations, which often represent restricted-range and  
51 endemic species. As natural habitat disappears and fragmentation continues to worsen (Jacobson et  
52 al. 2019; Powers and Jetz 2019), understanding how stochastic events affect remaining populations  
53 is crucial. In a rare long-term study on an endangered Bahamian woodpecker (*Melanerpes*  
54 *superciliaris nyeanus*), Akresh et al. (2020) demonstrate that the population experienced significant  
55 declines as a result of various hurricanes but was able to recover after several years, however  
56 increased future hurricane frequency could prevent this. Contrarily, a study on a small, 350-  
57 individual, population of *Cyclura nubila* revealed that the passing of Hurricane Ivan (2004) had no  
58 effect on its size (Beovides-Casas and Mancina 2006), demonstrating the resilience of large rock  
59 iguanas to catastrophic events. Overall, studies concerning the effect of hurricanes on reptile species

60 have mainly focused on small-size species (e.g., *Anolis*: Spiller et al. 1998; Schoener et al. 2001;  
61 Losos et al. 2003; Donihue et al. 2018, 2020; Dufour et al. 2019; Rabe et al. 2020). Insular iguanas  
62 are highly endangered ecological keystone species, and generally are the largest native remaining  
63 terrestrial species (IUCN 2020). As Caribbean hurricane frequency is projected to increase (Bender  
64 et al. 2010), understanding the impacts of hurricanes on iguana populations is important and is  
65 frequently highlighted but rarely quantified (Alberts 2004; Fogarty et al. 2004; Powell 2004;  
66 Pasachnik et al. 2012; but see Hayes et al. 2004, 2016; Beovides-Casas and Mancina 2006).

67         Among Caribbean Iguanids, the conservation status of the Lesser Antillean iguana (*Iguana*  
68 *delicatissima*) has experienced the most rapid deterioration (van den Burg et al. 2018a). Its pre-  
69 Colombian range has to date decreased by >80%, predominantly due to hybridization with *Iguana*  
70 *iguana* lineages (Vuillaume et al. 2015; Pounder et al. 2020), a process that was recently initiated  
71 on the last remaining  $\geq 2$  km<sup>2</sup> islands where *I. delicatissima* occurs (van den Burg et al. 2018b,  
72 2020; B. Angin pers. comm.). Left uncontrolled, the genetic loss of these populations will lead to a  
73 >99% decrease in their native range (van den Burg et al. 2018a). Critically, the five remaining  
74 populations that are free of nonnative iguanas occur on <2 km<sup>2</sup> islets with low estimated population  
75 sizes (only Petite Terre >1,000 individuals; Angin 2017; Pounder et al. 2020). Beyond the spread of  
76 *I. iguana* (Knapp et al. 2020), other threats come from habitat destruction, pets and free-roaming  
77 livestock, as well as other anthropogenic causes (e.g., vehicle-caused mortality) (Debrot et al. 2013;  
78 Knapp et al. 2014, 2016; van den Burg et al. 2018c). Although hurricanes are cited as a potential  
79 threat to population survival (e.g., Fogarty et al. 2004), only two studies have addressed this topic.  
80 Namely, Knapp and Valeria (2008) provide some insight through an observational account of nest  
81 site degeneration and iguana mortality caused by Hurricane Dean (2007) on Dominica. Focusing on  
82 Petite Terre (Guadeloupe), a second study provides insight into a likely decrease in population size  
83 due to Hurricane Hugo (1995; Lorvelec et al. 2004). However, since the monitoring methodology  
84 has been questioned (Breuil and Ib  n  , 2008; B Angin pers. comm.), no conclusions can be drawn.  
85 This study also predated new analytical tools and updates (e.g., Fiske and Chandler 2011).

86           Within the northern Lesser Antilles, St. Eustatius supports one of the last remaining *I.*  
87 *delicatissima* populations. This population suffered a major decline during the 1990s, in part due to  
88 consumptional demand on neighboring St. Maarten (Debrot et al. 2013), and is currently threatened  
89 by ongoing hybridization with *I. iguana* (van den Burg et al. 2018b). Despite the occasional arrival  
90 of stowaway iguanas, continuous monitoring has only resulted in 15 (Debrot et al. in review.)  
91 identified nonnative (pure or hybrid) animals, thus hybridization is believed to be minimal  
92 (unpublished data). The most recent estimates put the population size at below 500 individuals  
93 (Debrot et al. 2013), which has presumably since decreased due to ongoing anthropogenic threats  
94 (van den Burg et al. 2018c). Additionally to threats common for the species (see above), the  
95 population on St. Eustatius faces death by entrapment in abandoned cisterns, invasive rats, and the  
96 spread of the nonnative invasive Mexican creeper or Corallita (*Antigonon leptopus*) (Fogarty et al.  
97 2004; Debrot et al. 2013; van den Burg et al. 2018c). Although St. Eustatius fell within the  
98 trajectory of major 2017-season hurricanes (Fig. 1), an impact assessment for *I. delicatissima*  
99 population is lacking.

100           The 2017 Atlantic hurricane season was categorized as hyperactive, with an accumulated  
101 cyclone energy score within the top ten since registration started (Schultz et al. 2018). Of the six  
102 2017 hurricane-force systems, two closely passed St. Eustatius. On 6 September, the center of  
103 Hurricane Irma passed at ~54 km, and on 19 September, Hurricane Maria passed at roughly 110 km  
104 distance (Fig. 1; NOAA 2020). The goal of our study was to utilize iguana-survey data collected  
105 during 2017–2019 in order to assess the impact of the 2017 hurricane season on the St. Eustatius *I.*  
106 *delicatissima* population. To that end, we used island-wide transect survey data to estimate  
107 abundance, detection probability, and site occupancy per habitat type and year. Changes in  
108 occupancy, defined as the probability of a site being occupied (MacKenzie et al. 2002), provide a  
109 robust proxy for population declines, particularly for sparsely populated and cryptic species (Dénés  
110 et al. 2015; Beaudrot et al. 2016). We hypothesized that if population estimates were stable over  
111 this 3-year period, this would suggest that iguanas are resilient to catastrophic weather events.

112 However, if population estimates varied, this would suggest that external factors (directly and/or  
113 indirectly) impacted iguana survival.

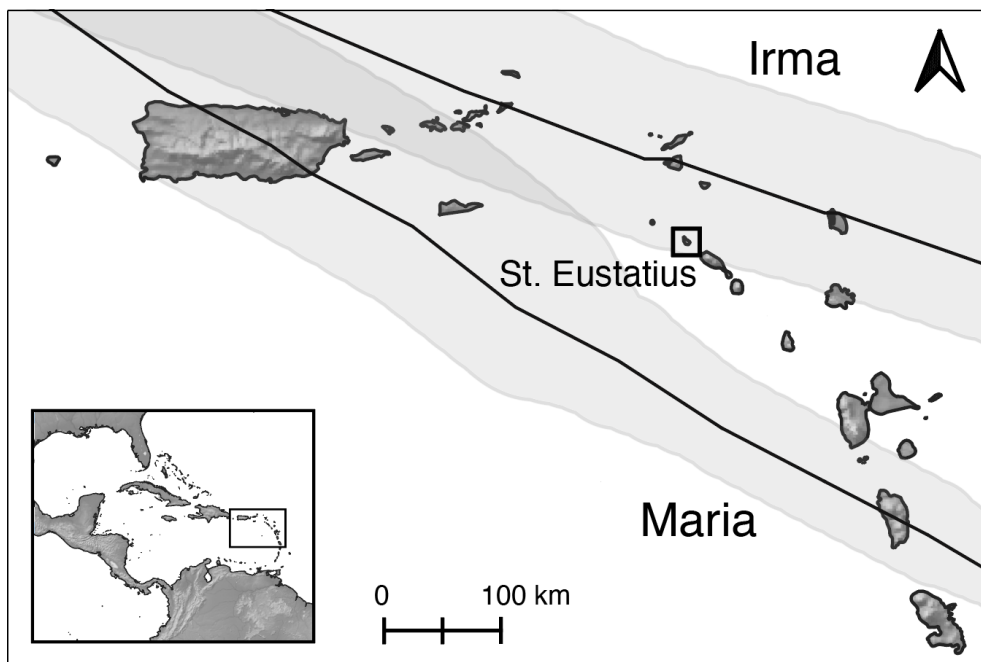

114  
115 **Fig. 1** Best trajectory paths and regions with hurricane force winds ( $\geq 64$ kt) for Hurricane Maria and Irma in  
116 the northern Greater Caribbean region. Data from the National Hurricane Center.

117

## 118 **Materials & Methods**

### 119 *Study area*

120 This study took place on St. Eustatius (17.49°N, -62.98°W), a small (21 km<sup>2</sup>) Leeward island within  
121 the northern Lesser Antilles (Fig. 1), with a human population of approximately 3,100 (Statistics  
122 Netherlands 2020). Habitat falls within the Caribbean dry forest and local climate is defined as  
123 Tropical Humid (Trewartha and Horn 1980), with over 90% of the island having a tropical savanna  
124 climate (<400 m) (De Freitas et al. 2012). Annual temperature fluctuates around 25–33 °C, with  
125 average annual rainfall around 1000 mm while the highest elevations receive <2,000 mm (Rojer  
126 1997; van Andel et al. 2016). Geographically, the island consists of two mountainous areas that  
127 originate from volcanic activity and uplift on the northern and southern end. These areas are  
128 separated by a lower elevational plain where most anthropogenic activity occurs. Historic island-  
129 wide agricultural practices have downgraded the habitat quality which has partially recovered due

130 to a significant decrease in such practices and conservation efforts, though habitats are affected still  
131 by grazers, erosion and invasive species (van Andel et al. 2016).

132  
133 *Transects*

134       Between 2017–2019, we conducted repeated count transect surveys to estimate site  
135 occupancy, detection probability and abundance of the *I. delicatissima* population (Royle and  
136 Nichols 2003). For this, we placed a total of 30 transects over the island, each 100 m in length, and  
137 visually surveyed up to 25 m on both sides (Fig. 2). Surveys were performed by minimally one  
138 observer with iguana-fieldwork experience, during hours of general iguana activity (Pasachnik et al.  
139 2002), and were limited to non-rainy days given ectotherm activity. We recorded the date, survey  
140 duration (min.), elevation (m), number of observers, and observed number of iguanas. Due to  
141 limited capacity to conduct surveys, transects were surveyed a maximum of six times per year.  
142 Transects included 47% of present habitat types representing 78.3% of the island’s surface. Several  
143 habitat types were not surveyed due to access restrictions (e.g., *Bothriochloa - Antigonon*) or  
144 physical safety (e.g., *Antirhea - Coccoloba* mountains). Furthermore, the northern area was  
145 surveyed less often than other habitats due to logistics and access difficulty of the area, and given an  
146 oil transshipment company occupies 10–15% of the island’s surface area. Following De Freitas et al.  
147 (2012) nomenclature, surveys were performed in eight habitat types (see Fig. 2, Table 1): *Pisonia -*  
148 *Antirhea* mountains; miscellaneous urban/agricultural or disturbed land; *Pisonia - Justicia* hills;  
149 *Capparis - Pisonia* mountains; *Rauvolfia - Antigonon* mountains; *Coccoloba - Bothriochloa* cliffs;  
150 *Pisonia - Eugenia* mountains; *Chionanthus - Nectandra* mountains.

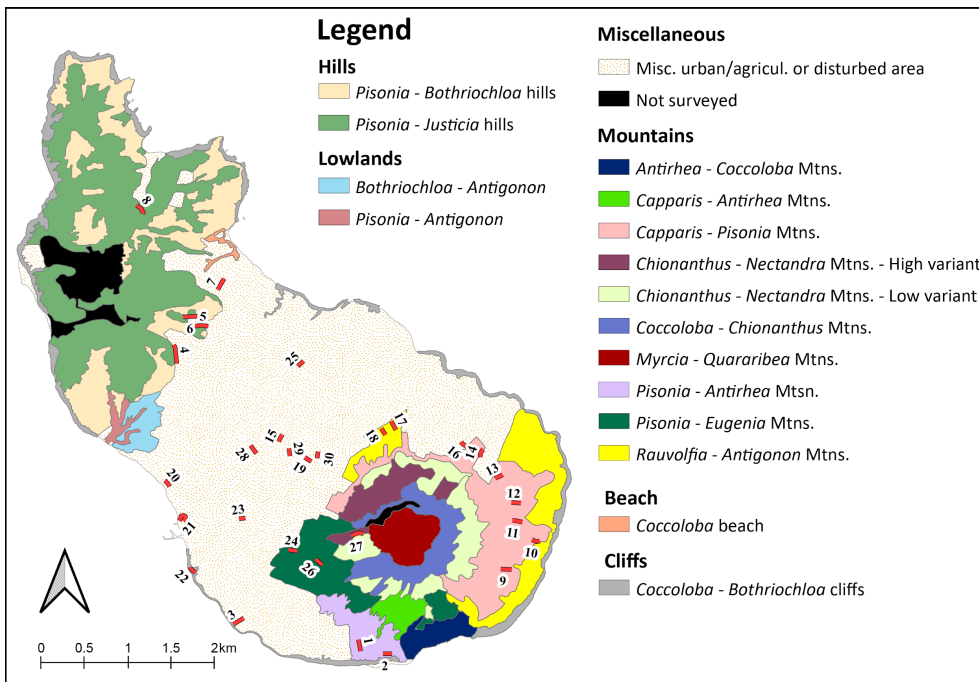

151

152

**Fig. 2** Map of St. Eustatius showing transect locations and habitat distribution. Habitat names following De

153

Freitas et al. (2012).

154 **Table 1** Summary of transect surveys conducted on St. Eustatius between 2017–2019. Habitat name

155 following De Freitas et al. (2012). All transects constituted 100 m in length with a surveyed area of 500 m<sup>2</sup>.

| Habitat name                               | Transect nr. | Lat.     | Lon.     | Start elev. (m) |
|--------------------------------------------|--------------|----------|----------|-----------------|
| <i>Pisonia - Antirhea</i> mountains        | (1)          | 17.4672  | -62.9681 | 69              |
|                                            | (2)          | 17.4659  | -62.9643 | 41              |
| Misc. urban/agricultural or disturbed land | (3)          | 17.4691  | -62.9808 | 12              |
|                                            | (4)          | 17.4947  | -62.9867 | 59              |
|                                            | (5)          | 17.4985  | -62.9835 | 53              |
|                                            | (7)          | 17.5024  | -62.9825 | 25              |
|                                            | (15)         | 17.4869  | -62.9759 | 93              |
|                                            | (16)         | 17.4868  | -62.9573 | 117             |
|                                            | (19)         | 17.4847  | -62.9728 | 141             |
|                                            | (20)         | 17.4831  | -62.9879 | 14              |
|                                            | (21)         | 17.4797  | -62.9860 | 25              |
|                                            | (23)         | 17.4794  | -62.9801 | 87              |
|                                            | (25)         | 17.4945  | -62.9742 | 48              |
|                                            | (28)         | 17.4859  | -62.9783 | 91              |
|                                            | (29)         | 17.4856  | -62.9749 | 114             |
| (30)                                       | 17.4862      | -62.9721 | 123      |                 |
| <i>Pisonia - Justicia</i> hills            | (6)          | 17.4994  | -62.9844 | 66              |
|                                            | (8)          | 17.5098  | -62.9900 | 70              |
| <i>Capparis - Pisonia</i> mountains        | (9)          | 17.4742  | -62.9518 | 79              |
|                                            | (10)         | 17.4774  | -62.9499 | 50              |
|                                            | (11)         | 17.4790  | -62.9508 | 72              |
|                                            | (12)         | 17.4806  | -62.9510 | 80              |
|                                            | (13)         | 17.4837  | -62.9527 | 104             |
|                                            | (14)         | 17.4862  | -62.9547 | 99              |
| <i>Rauvolfia - Antigonon</i> mountains     | (17)         | 17.4892  | -62.9642 | 104             |
|                                            | (18)         | 17.4884  | -62.9654 | 117             |
| <i>Coccoloba - Bothriochloa</i> cliffs     | (22)         | 17.4745  | -62.9852 | 12              |
| <i>Pisonia - Eugenia</i> mountains         | (24)         | 17.4764  | -62.9748 | 149             |
|                                            | (26)         | 17.4754  | -62.9726 | 190             |



|                                              |      |         |          |     |
|----------------------------------------------|------|---------|----------|-----|
| <i>Chionanthus -<br/>Nectandra</i> mountains | (27) | 17.4780 | -62.9670 | 386 |
|----------------------------------------------|------|---------|----------|-----|

156

157 *Opportunistic surveys/sightings*

158           Since 2015, subadult and adult iguanas have been tagged with colored glass beads to  
159 facilitate subsequent noninvasive tracking and observations of individuals using unique color  
160 combinations (Binns and Burton 2007). To date, 540 unique bead codes have been assigned, and an  
161 additional 96 iguanas have been tagged only with PIT tags. This methodology has allowed for  
162 opportunistic data collection of the geographic locations of bead-tagged iguanas. We utilized these  
163 data as an additional indicator for variation in population size.

164

165 *Data analyses*

166           As our dataset contained a large number of non-detections and small counts of iguanas, we  
167 chose an *N*-mixture model approach over distance sampling (Royle 2004). Models were based on  
168 four assumptions: (i) the iguana population in each site was closed to colonization and extinction  
169 during the sampling period; (ii) iguanas were either detected or not detected during surveys; (iii)  
170 iguanas were not falsely detected during surveys; and (iv) iguana detections at each site were  
171 independent (Murray and Sandercock 2020). We followed the methods described by Madden et al.  
172 (2021). Briefly, we used likelihood-based single-season occupancy models (MacKenzie et al.  
173 2017), using the R packages “wqid” and “unmarked” (MacKenzie et al. 2002; Fiske and Chandler  
174 2011), to estimate site occupancy ( $\psi$ ) in relation to habitat and elevation, while accounting for  
175 detectability ( $p$ ). We modeled detection probability and occupancy probability to estimate iguana  
176 abundance ( $\lambda$ ), and also tested the influence of independent variables on abundance estimates,  
177 including quadratic terms. Resulting models were ranked using Akaike’s Information Criterion,  
178 where the detection model with the lowest AICc is best-fitting [AICc; Burnham and Anderson  
179 (2002)], while correcting for small sample size. Finally, we tested for overdispersion by assessing  
180 the goodness-of-fit of the most parsimonious model in each year (MacKenzie and Bailey 2004)

|

181 with the “mb.gof.test” function in the package “AICcmodavg” using 1,000 simulations, which  
182 calculates a Pearson’s chi-square fit statistic from the observed and expected frequencies of  
183 detection histories for a given model. All analyses were performed in the R environment v3.5.1 (R  
184 Core Team 2019).

## 185 186 **Results**

### 187 *Pre-hurricane survey occupancy, detection and abundance estimates*

188 We conducted 180 surveys between February and April 2017, prior to hurricanes Irma and Maria,  
189 during which we detected 58 individual iguanas. Average transect time was  $32 \pm 14$  minutes. As  
190 results for both R packages provided identical patterns we only report “wqid” results here, and  
191 “unmarked” results are presented in the Electronic Supplementary Information.

192       Occupancy probability was 100% (range 0–100%), and iguana occupancy and abundance  
193 increased with elevation (Figs. 3–4) as well as with survey effort. Occupancy estimates were  
194 generally consistent across the habitats sampled (Table 2). Mean detection probability ( $p$ ) per  
195 transect was 0.19 (range 0.14–0.26), which increased to 0.27 when an iguana had been previously  
196 detected. The effects of predictor variables ‘survey time’ and ‘week’ on detection and occupancy  
197 estimates were negligible ( $\Delta AIC_c < 2$ ). We observed a lack of fit of the null model (without  
198 covariates;  $\chi^2 = \text{inf}$ ,  $p = 0$ ,  $\hat{c} = \text{inf}$ ). Estimated mean individual abundance ( $\lambda$ ) was  $5.91 (\pm \text{SE}$   
199  $0.01)$ . When habitat and elevation were included as response variables,  $\lambda$  estimates were  $1.52 \pm 0.65$   
200 (Fig. 5), which translates to a population estimate across the entire study area (13.5 ha) of 1,364  
201 iguanas. Lowest iguana abundance was found in *Coccoloba - Bothriochloa* cliff habitat, and highest  
202 in *Chionanthus - Nectandra* mountain habitat.

203  
204 *Post-hurricane survey occupancy, detection and abundance estimates*

205 Post-2017, we surveyed identical transects between July–December 2018 and March–September  
206 2019. Overall, 164 transects were performed during which we detected 13 iguanas in 2018 and 27  
207 iguanas in 2019. Average transect time was  $19 \pm 8$  minutes.

208       Occupancy probability was 32.5% (range 11.8–63.4%) in 2018, and 36.7% (19.2–58.5%) in  
209 2019. Iguana occupancy decreased with increasing elevation in 2018 and 2019 (Fig. 3), but  
210 increased with survey effort; up to four repeats in 2018 and three in 2019. Occupancy estimates  
211 were lower than those from 2017 but generally consistent across habitats (Table 2).  $p$  was 0.41  
212 (range 0.14–0.74) in 2018, and 0.67 (0.39–0.87) in 2019, decreasing to 0.28 (0.07–0.67; 2018) and  
213 0.36 (0.14–0.66; 2019) when an iguana had been previously detected.  $\lambda$  was  $5.89 \pm 0.02$  in both  
214 2018 and 2019. Considering habitat and elevation,  $\lambda$  estimates were  $1.16 \pm 0.15$  in 2018 and  $1.19 \pm$   
215  $0.18$  in 2019 (Fig. 5), translating to population estimates of 1,046 and 1,003 iguanas, respectively;  
216 declines of 23.3% and 26.5% compared to 2017. The covariate ‘survey time’ from the most  
217 parsimonious model had a positive effect on detection probability ( $0.80 \pm 0.49$ ) in 2018, however  
218 we observed a lack of fit of this model (‘survey time’;  $X^2 = \text{inf}$ ,  $p = 0$ ,  $\hat{c} = \text{inf}$ ). The effect of  
219 covariates on detection and occupancy estimates in 2019 were negligible ( $\Delta\text{AIC}_c < 2$ ). There was no  
220 evidence for lack of fit in 2019 ( $X^2 = 33.86$ ,  $p = 0.66$ ,  $\hat{c} = 0.62$ ). Habitat abundances were lower in  
221 2018 and 2019 compared to 2017, with only abundance range overlap in the *Pisonia - Antirhea*  
222 mountain and miscellaneous urban/agricultural or disturbed land habitat types (Fig. 5); compared to  
223 2017, average decline in iguana abundance among habitats was 23.8% and 22.0% for 2018 and  
224 2019, respectively. Overall, a two-way additive ANOVA indicated no significant difference of  
225 iguana abundance among years ( $F_{2,14} = 3.49$ ,  $p = 0.059$ ), and a significant difference between  
226 habitats ( $F_{7,14} = 3.76$ ,  $p = 0.017$ ).

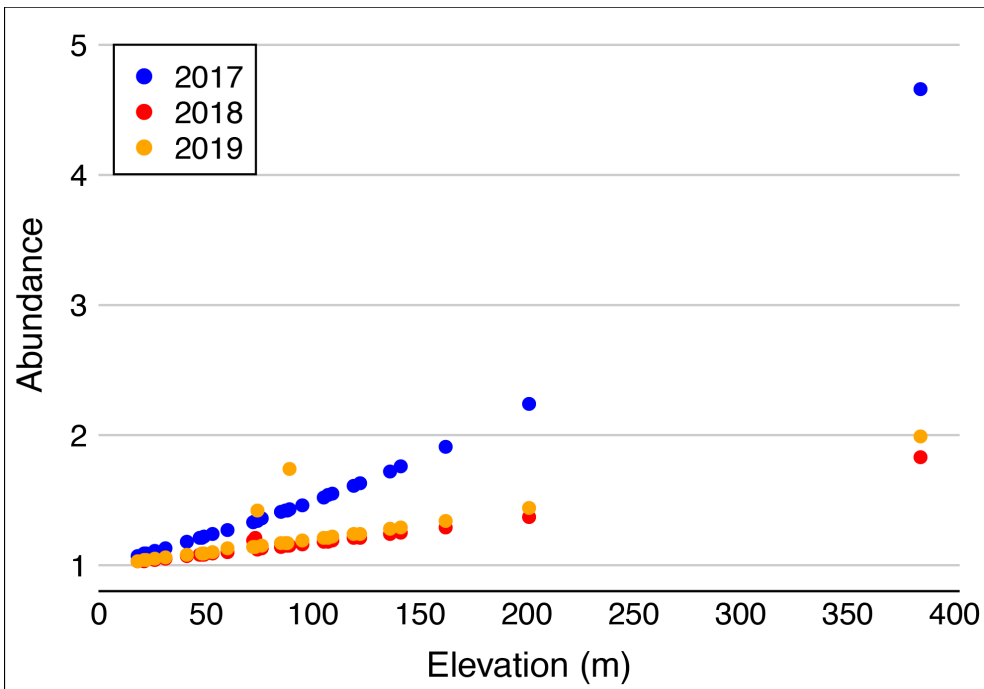

227  
228 **Fig. 3** The effect of elevation on abundance (lambda) estimates of *Iguana delicatissima* based on transect  
229 surveys conducted on St. Eustatius in 2017 (pre-hurricane), 2018 and 2019 (post-hurricane).

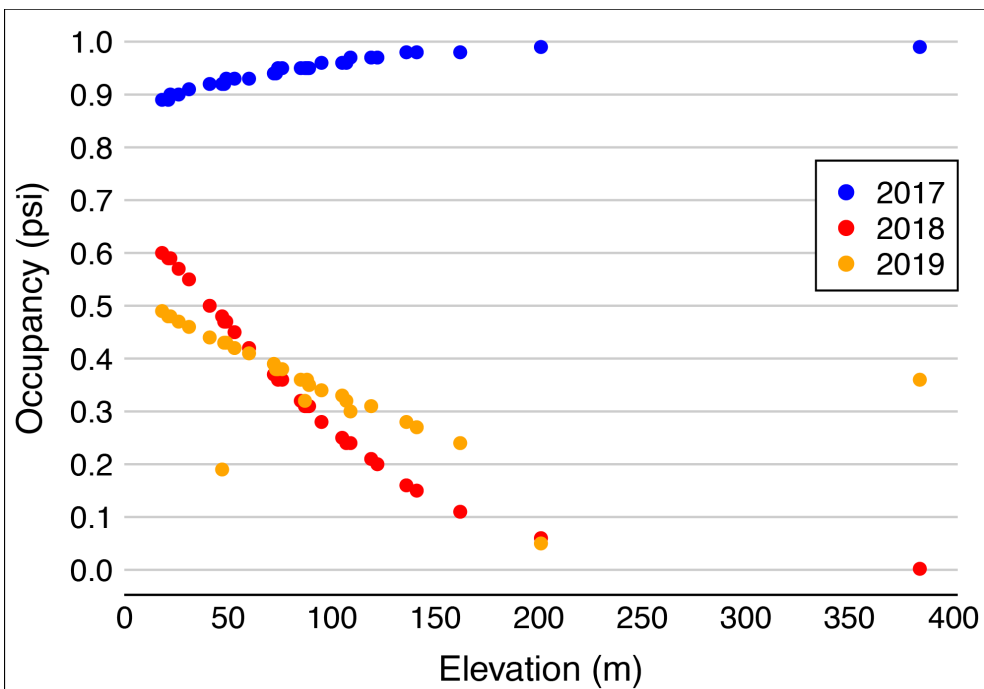

230  
231 **Fig. 4** The effect of elevation on site occupancy estimates of *Iguana delicatissima* based on transect surveys  
232 conducted on St. Eustatius in 2017 (pre-hurricane), 2018 and 2019 (post-hurricane).  
233

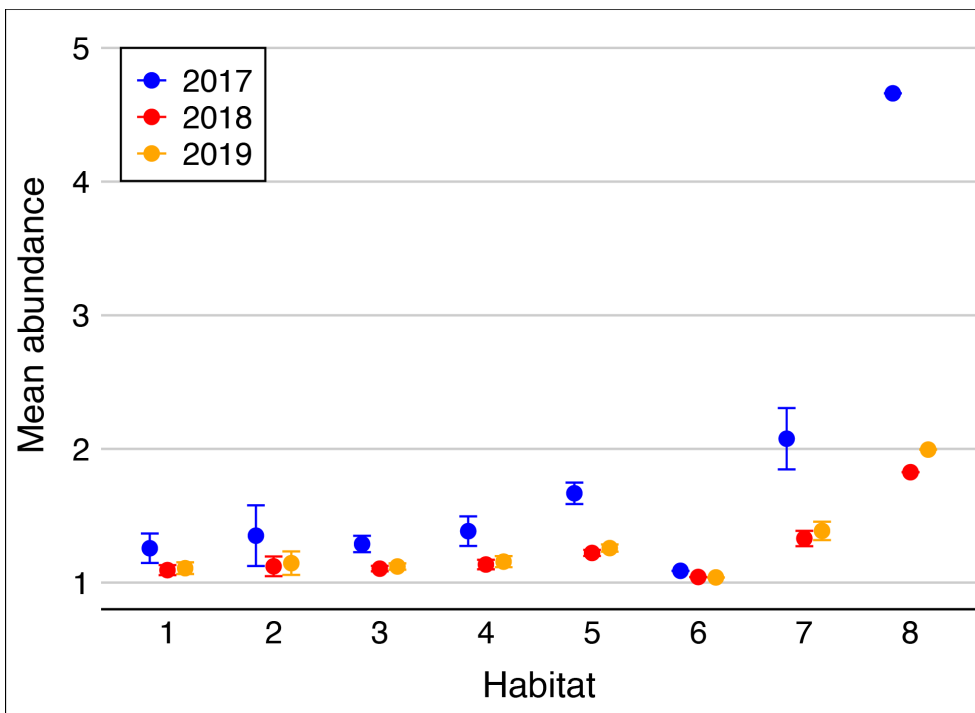

234  
235 **Fig. 5** Mean iguana abundance estimates per habitat type for 2017–2019, with standard deviations bars.

236 Habitat following De Freitas et al. (2012): 1 = *Pisonia - Antirhea* mountains; 2 = miscellaneous  
237 urban/agricultural or disturbed land; 3 = *Pisonia - Justicia* hills; 4 = *Capparis - Pisonia* mountains; 5 =  
238 *Rauvolfia - Antigonon* mountains; 6 = *Coccoloba - Bothriochloa* cliffs; 7 = *Pisonia - Eugenia* mountains; 8 =  
239 *Chionanthus - Nectandra* mountains.

240  
241 **Table 2** Overview of 2017–2019 site occupancy estimates per habitat of *Iguana delicatissima* on St.  
242 Eustatius. Data represents the probability of a site to be occupied ( $\psi$ ), as well as confidence intervals (CI).  
243 Habitat following De Freitas et al. (2012): 1 = *Pisonia - Antirhea* mountains; 2 = miscellaneous  
244 urban/agricultural or disturbed land; 3 = *Pisonia - Justicia* hills; 4 = *Capparis - Pisonia* mountains; 5 =  
245 *Rauvolfia - Antigonon* mountains; 6 = *Coccoloba - Bothriochloa* cliffs; 7 = *Pisonia - Eugenia* mountains; 8 =  
246 *Chionanthus - Nectandra* mountains.

| Habitat | 2017   |             | 2018   |           | 2019   |           |
|---------|--------|-------------|--------|-----------|--------|-----------|
|         | $\psi$ | CI          | $\psi$ | CI        | $\psi$ | CI        |
| 1       | 0.98   | <0.001–1.00 | 0.37   | 0.07–0.81 | 0.37   | 0.12–0.71 |
| 2       | 0.98   | <0.001–1.00 | 0.35   | 0.10–0.73 | 0.37   | 0.16–0.63 |
| 3       | 0.99   | <0.001–1.00 | 0.34   | 0.11–0.66 | 0.37   | 0.19–0.59 |
| 4       | 0.99   | <0.001–1.00 | 0.32   | 0.11–0.64 | 0.36   | 0.18–0.61 |
| 5       | 0.99   | <0.001–1.00 | 0.31   | 0.09–0.66 | 0.36   | 0.13–0.67 |
| 6       | 0.99   | <0.001–1.00 | 0.29   | 0.06–0.72 | 0.36   | 0.09–0.76 |
| 7       | 0.99   | <0.001–1.00 | 0.28   | 0.04–0.78 | 0.36   | 0.06–0.83 |
| 8       | 1.00   | <0.001–1.00 | 0.26   | 0.02–0.84 | 0.35   | 0.04–0.88 |

247 *Bead-tag data*

248 Opportunistic sighting data were collected during 76, 78 and 56 days in 2017, 2018 and  
249 2019, respectively. Assessment of the geographic distribution of those data indicates both time and  
250 geographic effort was comparably equal for 2017 and 2018, allowing a direct comparison (see  
251 Electronic Supplementary Information), though not for 2019. Of the 145 uniquely bead-tagged  
252 iguanas observed in 2017, 36 (24.8%) were observed during 2018.

253

254 **Discussion**

255 Our study demonstrates that multiple *I. delicatissima* population parameters decreased following the  
256 high-intensity hurricane year of 2017, with a decrease in estimates of population size, abundance,  
257 site occupancy, and opportunistic sightings of tagged iguanas. We did not observe a clear  
258 boomerang effect, as 2018-2019 parameters were mostly stable. These data are important to  
259 consider from a conservation and long-term stability perspective, given the small sizes of remaining  
260 populations of this highly endangered species. Overall, we present a rare effect-analysis of  
261 hurricane impact on a wild population of a large, long-lived reptile.

262 *Iguana delicatissima* inhabits most vegetation types within its native range, e.g., mangroves,  
263 high evergreen forest, dry shrublands, and gardens (for an overview see Henderson and Powell  
264 [2009]). On St. Eustatius, earlier studies found that iguana abundance was highest on vegetated  
265 slopes/cliffs and on the northwest flank of the dormant volcano where large estates are built within  
266 the tall evergreen forest (Fogarty et al. 2004; Debrot et al. 2013). Similarly, we found that iguana  
267 abundance was high in habitats on the western slopes of the volcano, though transects were not  
268 placed in gardens (Fig. 5). Thus, besides gardens, also the periferic habitats of this residential area  
269 are important iguana habitats. Indeed, Knapp and Perez-Heydrich (2012) found that biometric  
270 variables did not differ between iguanas living in- and outside of gardens. Furthermore, highest  
271 iguana abundance was found in the *Chionanthus* - *Nectandra* mountain habitat (De Freitas et al.  
272 2012), at high (386m) elevation on the volcano, however this habitat was covered by a single

273 transect, thus we lack a perspective of variation. Additionally, we found higher iguana abundances  
274 in the *Pisonia-Eugenia* mountain habitat, located on the lower/mid (150–200m) south-western  
275 slopes of the Quill. This habitat is described as a secondary forest and, according to van Anandel et al.  
276 (2016), “has a much lower diversity, density and canopy height than the forest on the wetter slope”.  
277 Nevertheless, it is likely suitable and heterogenous habitat for iguanas and supports a variety of tree  
278 species including *Bourreria baccata*, *Pisonia subcordata*, *Guettarda scabra* and *Bursera simaruba*  
279 (van Anandel et al. 2016) of which several are a known dietary source (Angin and Questel in prep.).

280 In contrast, *Rauvolfia - Antigonon* habitat is described as disturbed, regenerating shrubland  
281 with few trees, low floristic diversity and is covered extensively by an invasive vine (van Anandel et  
282 al. 2016). Our results show that iguana abundance is surprisingly relatively high in this habitat type.  
283 We note that the patch covered by our survey efforts appears of higher quality than the remainder of  
284 this habitat type on the south-western side of the island, which is heavily grazed by free-roaming  
285 herbivores (van Anandel et al. 2016; Madden 2020). Namely, the included patch has larger trees, is  
286 less degraded, and lies adjacent to secondary roads and semi-urban development. Consequently, we  
287 believe that our abundance estimates only apply to the covered patch of *Rauvolfia - Antigonon*  
288 habitat.

289 Detection probability increased from 2017 to 2019 but was overall low (<0.5) across all  
290 years. Nevertheless, detection probability estimates were similar to/higher than those from  
291 comparable studies (Bock et al. 2016; Rivera-Milán and Haakonsson 2020). However, when an  
292 iguana was previously observed, detection probability was equal across years. We did not test for  
293 observer effort, which may account for unequal detection between years and should ideally be  
294 consistent (Burton and Rivera-Milán 2014).; for our surveys, average number of observers was  
295 constant over the years (between 2–2.4), and surveys were always led by an experienced iguana-  
296 fieldwork technician. Vegetation damage (e.g., broken branches) may have resulted in higher  
297 detection probability post-hurricane compared to pre-hurricane, though generally iguanas are harder  
298 to detect in forested areas than other habitats. We were unable to locate specific published studies

299 on iguanas to support this, but reptile species overall are cryptic and considered difficult to study  
300 (e.g., Durso et al. 2011; Sewell et al. 2012).

301 Our study provides evidence that the St. Eustatius *I. delicatissima* population declined  
302 during 2017, during which two major catastrophic events hit the island; Hurricanes Maria and Irma.  
303 As behavioural data of iguanas during such events are absent, pinpointing the exact cause of decline  
304 is more challenging; how did iguanas die, and was that during or after the events? Post-event  
305 mortality, in the absence of sustained physical injury, could result from a lower abundance of food.  
306 Indeed, the majority of trees were defoliated due to high wind speeds and likely salt spray (Eppinga  
307 and Pucko 2018). However, as not all trees were defoliated, and iguanas are known to survive  
308 extended periods of drought (van Buurt 2010), we anticipate that post-event mortality due to  
309 starvation had a minor contribution to the observed declines. Instead, we hypothesize that hurricane  
310 conditions, either led to deadly physical injuries or translocated iguanas into the Caribbean Sea (see  
311 Censky et al. 1998). Whether non-deadly on-island translocation is possible is unknown, though as  
312 both abundances declined for all habitat and opportunistic sightings declined drastically, this  
313 possibility appears unlikely. Although challenging to collect, future data on iguana movement  
314 during hurricane events could provide more insight.

315 We found evidence for overdispersion when calculating site occupancy measures for 2017  
316 and 2018, which resulted in inflated standard errors (Table 2). However, given the lack of  
317 significance of covariates overall (only ‘survey time’ increased detection probability in 2018), we  
318 chose to retain AICc model weights than pursue a quasi-likelihood theory (MacKenzie and Bailey  
319 2004). We recognize the limitations of our study with regard to the assumptions of occupancy  
320 modeling (Murray and Sandercock 2020), however we are confident that we met most if not all of  
321 the assumptions. We assumed that iguana detection was independent between sites, given the  
322 species’ limited home range (van Wagensveld et al. in prep.), and that the sites surveyed were  
323 discrete patches of habitat (except one survey track in the *Chionanthus* - *Nectandra* mountains  
324 habitat). Nevertheless, we recognize that there may be more variation in the observed site



325 occupancy data than expected by the models. Considering the already wide confidence intervals,  
326 however, we are of the opinion that the models presented offer a realistic representation of the pre-  
327 /post-hurricane population data.

328         Despite the small size of St. Eustatius, our results suggest that the 2017 hurricanes affected  
329 iguanas disproportionately across the island. Namely, although abundance and occupancy decreased  
330 island wide, iguanas at higher elevations suffered stronger declines (Fig. 3–4). This finding is  
331 corroborated by data from Eppinga and Pucko (2018) who assessed the impact of both 2017  
332 hurricanes on the forests of St. Eustatius and found that a higher percentage of trees was snapped at  
333 higher elevations. Eppinga and Pucko (2018) further show that over 90% of all trees were defoliated  
334 for >75% and over 75% of trees lost primary branches, suggesting that Irma and Maria heavily  
335 affected arboreal species. Indeed, hurricane wind speeds are stronger at higher elevations  
336 (Holthuijsen et al. 2012), whereby our findings could be explained by increased mortality through  
337 physical injury during hurricane events, as well as subsequently through longer food unavailability  
338 (Cely 1991).

339         Understanding the natural movements of study species is important to consider in  
340 population assessments (Neilson et al. 2018). Both *Iguana* species are known to remain static  
341 throughout most of their life cycle, with movement mainly restricted to the hatchling life stage until  
342 settling in breeding populations, and by adult females while traveling to nesting sites (Burghardt  
343 and Rand 1985; Bock and McCracken 1988; Knapp et al. 2016). For *I. delicatissima*, the  
344 reproductive cycle of populations on arid islands is clearly defined with nesting mainly occurring in  
345 June-August (van den Burg et al. 2018a). Reproductive data for the St. Eustatius population remains  
346 limited but appears to occur in June-July (pers. obs. by authors), which was considered while  
347 planning field surveys. As no large communal nesting sites occur on St. Eustatius (as opposed to  
348 Dominica, Knapp et al. 2016), and small isolated nesting sites have been located around the island  
349 (Debrot et al. 2013; pers. obs. by authors), we suspect gravid females to undertake little movement  
350 and nest within or close to their home range. This is further strengthened by the restricted size and

351 highly fragmented status of the population (Debrot et al. 2013; van den Burg et al. 2018b), with  
352 interaction observations being rare (pers. obs. by authors).

353         Despite over half of Iguanidae diversity occurring in the Greater Caribbean region,  
354 hurricane impacts on their populations have been rarely addressed. Beovides-Casas and Mancina  
355 (2006) performed a total of 60 surveys (12 each during 4 visits) of the *Cyclura nubila* population on  
356 Cayo Sijú (Cuba) in 2004, with the final visit post-Hurricane Ivan. Although Ivan passed at ~160  
357 km distance with sea level rising by 2.5 meter, their data indicated the population size remained  
358 stable. In another study, Hayes et al. (2004) report local extinction of a *Cyclura rileyi* population  
359 from a small Bahamian cay following the passing of Hurricane Floyd (1999). However, it is  
360 important to note that the authors indicated only three animals were observed by themselves there,  
361 with a personal comment from the previous decade about 18 animals. Thus, the subsequent  
362 reference of population extirpation following a hurricane event (e.g., Hayes et al. 2016) without  
363 mention of these numbers and overall poor knowledge of the population in question appears  
364 unjustified. Additionally, Hayes et al. (2004) also report no decrease in adult iguanas from a nearby  
365 cay, with a large population. In our study, we found that multiple population parameters decreased  
366 after an intense hurricane season; a decrease in I) population size of the studied area (23.3–26.5%)  
367 and II) abundance (22–23.8%), as well as III) a 75% reduction in the number of opportunistic  
368 sightings of tagged iguanas between 2017–2018. However, as studies remain scarce, equally are  
369 generalizations and comparisons. Compared to *I. delicatissima*, *Cyclura* sp. are larger and more  
370 robust, mainly non-arboreal iguanas. Although pre-hurricane behavior for *I. delicatissima* is  
371 unknown, presumably lighter iguanas that remain arboreal during catastrophic weather events are  
372 more vulnerable than heavier, terrestrial iguanas. However, inundation might force *Cyclura* sp. to  
373 ascend trees in order to avoid being swept away given their range mostly includes low-elevation  
374 islets.

375         To evaluate the impact of catastrophic events on closed populations, consideration of these  
376 events' timing compared to a species' reproductive cycle is essential (Schoener et al. 2004). For St.

377 Eustatius, both 2017 hurricanes passed as strong early storms, preceding the main hatching period  
378 of the local *I. delicatissima* population while most eggs were incubating and therefore presumably  
379 safe in the absence of inundation. Later-seasonal storms are expected to have a more severe impact,  
380 as hatchlings are vulnerable to high wind speeds, thus potentially losing most individuals of an  
381 entire generation. Indeed, Hayes et al. (2004) compared hatching percentage between subsequent  
382 years and reported an extremely small hatchling cohort after the passing of Hurricane Floyd, which  
383 hit the Bahamas during the hatching period of *C. rileyi*. No information is available about the  
384 percentage of hatched clutches. On St. Eustatius only some nesting occurs on the island's lower  
385 elevations with the majority of nest sites found at elevations far higher than sea-level inundation  
386 (Debrot et al. 2013). Although data on egg survival and hatching success after inundation is known  
387 for some reptilians (Hsu et al. 2021), such data is missing for Iguanids.

388 Effect assessments of the 2017 Atlantic hurricane season are demonstrating its broad impact  
389 on ecosystems and their trophic levels; e.g., beach, mangrove and forest ecosystems (Liu et al.  
390 2018; Barreto-Orta et al. 2019; Walker et al. 2019; Hall et al. 2020), salt- and freshwater fish  
391 communities (Meléndez-Vazquez et al. 2019; Neal et al. 2020), insect species and communities  
392 (Cabrera-Asencio and Meléndez-Ackerman 2021), birds (Palmer et al. 2018; Lloyd et al. 2019), and  
393 seas slugs (Middlebrooks et al. 2020). For St. Eustatius specifically, our data adds to the  
394 understanding of an ecosystem-wide hurricane impact during 2017 which, besides iguanas, affected  
395 both forests (Eppinga and Pucko 2018) and the populations of Bridled Quail-dove (Rivera-Milán et  
396 al. 2021) and Red-bellied racer (Madden et al. 2021). Importantly, these insights and novel risk  
397 assessments are demonstrating the high extinction risk that endemic, island species will face under  
398 projected climate change (Manes et al. 2021).

399

#### 400 *Conservation*

401 From a conservation perspective, the status of *I. delicatissima* is at its most benign, with  
402 only five populations not directly threatened by on-island hybridization, of which just a single

|

403 island has a >200 population size; Petite Terre (Guadeloupe). Our study further highlights this  
404 vulnerability, as local extinction or population declines to unsustainable sizes could be the result of  
405 major hurricanes. Especially the extremely small population of Anguilla is vulnerable (Pounder et  
406 al. 2020), which currently occurs on a small low-level islet. There, the potential of temporarily  
407 holding iguanas to increase hurricane survival should be assessed, given adequate facilities can be  
408 utilized. On St. Eustatius, we found no post-hurricane population recovery (or boomerang effect),  
409 which could be linked to the small size of the existing population. Therefore, the projected increase  
410 in frequency and intensity of catastrophic hurricanes (Bender et al. 2010) is troubling as populations  
411 might be unable to recover between subsequent catastrophic events (McCoid 1996; Schriever et al.  
412 2009; Selman 2015). However, we note that a short-term boomerang effect was likely absent given  
413 the apparent low fecundity on St. Eustatius, possibly due to the population's low genetic diversity  
414 (van den Burg et al. 2018b), although a detailed study on fecundity still is absent. Overall, our study  
415 strengthens the need for population-increasing measures to be taken.

#### 416 **Acknowledgments**

417 We thank Adam Mitchell, Sarinda Westerhout, Joey Markx, Rupert Redan, and all STENAPA staff  
418 and volunteers that helped with data collection. Funding was provided through the Mohamed bin  
419 Zayed Species Conservation fund (172517158), International Iguana Foundation, and, the BEST 2.0  
420 program.

421

422

#### 423 **References**

424 Angin B (2017) Plan National d'Actions pour le rétablissement de l'iguane des petites Antilles,  
425 *Iguana delicatissima*, 2018–2022. 69p. + annexes.

426

427 Alberts AC (2004) Conservation strategies for West Indian rock iguanas (genus *Cyclura*): Current  
428 efforts and future directions. *Iguana* 11:213–223.

429

430 Akresh ME, Askins AA, King DI, Hayes FE, Barry PE, Hayes WK (2020) Resilience in the  
431 aftermath of hurricanes: fluctuations in a Critically Endangered population of West Indian  
432 Woodpeckers *Melanerpes superciliaris nyeanus* over two decades. *Bird Conserv Int*  
433 doi:10.1017/S0959270920000386

434

435 Barreto-Orta M, Méndez-Tejeda R, Rodriguez E, Cabrera N, Diaz E, Pérez K (2019) State of the  
436 beaches in Puerto Rico after Hurricane Maria (2017). *Shore Beach* 87:16–23.

437

438 Beaudrot L, et al. (2016) Standardized assessment of biodiversity trends in tropical forest protected  
439 areas: the end is not in sight. *PLoS Biol* 14:e1002357.

440

- 441 Behie AM, Pavelka MSM (2005) The short-term effects of a hurricane on the diet and activity of  
442 Black Howlers (*Alouatta pigra*) in Monkey River, Belize. *Folia Primatol* 76:1–9.  
443
- 444 Bender MA, Knutson TR, Tuleya RE, Sirutis JJ, Vecchi GA, Garner ST, Held IM (2010) Modeled  
445 impact of anthropogenic warming on the frequency of intense Atlantic Hurricanes. *Science*  
446 327:454–458.  
447
- 448 Beovides-Casas K, Mancina CA (2006) Natural history and morphometry of the Cuban iguana  
449 (*Cyclura nubila* Gray, 1831) in Cayo Siju, Cuba. *Anim Biodivers Conserv* 29:1–8.  
450
- 451 Binns J, Burton F (2007) *Bead Tags*. International Reptile Conservation Foundation and Blue  
452 Iguana Recovery Program.  
453
- 454 Bock BC, McCracken GF (1988) Genetic structure and variability in the Green iguana (*Iguana*  
455 *iguana*). *J Herpetol* 22:316–322.  
456
- 457 Bock BC, Páez VP, Rand AS, Burghardt GM, Iverson JB, Grant TD, Knapp CR, Pasachnik SA  
458 (2016) Life table and stochastic matrix projection analysis for a population of Green Iguanas  
459 (*Iguana iguana*): implications for conservation and control. *Iguanas: biology, systematics, and*  
460 *conservation*. *Herpetol Conserv Biol* 11:47–60.  
461
- 462 Breuil M, Ibéné B (2008) Réponse au droit de réponse de Lorvelec et al. (2008). *Bulletin Société*  
463 *Herpétologique de France* 128:49–52.  
464
- 465 Burghardt GM, Rand AS (1985) Group size and growth rate in hatchling green iguanas (*Iguana*  
466 *iguana*). *Behav Ecol Sociobiol* 18:101–104.  
467
- 468 Burnham KP, Anderson DR (2002) *Model selection and multimodel inference: a practical*  
469 *information-theoretic approach*. Second edition. Springer-Verlag, New York, USA.  
470
- 471 Burton FJ, Rivera-Milán FF (2014) Monitoring a population of translocated Grand Cayman blue  
472 iguanas: assessing the accuracy and precision of distance sampling and repeated counts. *Anim*  
473 *Conserv* 17:40–47.  
474
- 475 Cabrera-Asencio I, Meléndez-Ackerman EJ (2021) Community and Species-Level Changes of  
476 Insect Species Visiting *Mangifera indica* Flowers Following Hurricane María: “The Devil Is in the  
477 Details”. *Front Ecol Evol* 9:556821.  
478
- 479 Cely JE (1991) Wildlife effects of hurricane Hugo. *J Coast Res* 8:319–326.  
480
- 481 Censky EJ, Hodge K, Dudley J (1998) Over-water dispersal of lizards due to hurricanes. *Nature*  
482 395:556.  
483
- 484 De Freitas JA, Rojer AC, Nijhof BSJ, Debrot AO (2012) A landscape ecological vegetation map of  
485 Sint Eustatius (Lesser Antilles). IMARES, CARMABI and Royal Netherlands Academy of Arts  
486 and Sciences, Amsterdam.  
487
- 488 Debrot AO, Boman E, Madden H (2013) The Lesser Antillean Iguana on St. Eustatius: A 2012  
489 population status update and causes for concern. *IRCF Reptiles & Amphibians* 20:44–52.  
490

- 491 Dénes FV, Silveira LF, Beissinger SR (2015) Estimating abundance of unmarked animal  
492 populations: accounting for imperfect detection and other sources of zero inflation. *Methods Ecol &*  
493 *Evol* 6:543–556.
- 494  
495 Donihue CM, Herrel A, Fabre A-C, Kamath A, Geneva AJ, Schoener TW, Kolbe JJ, Losos JB  
496 (2018) Hurricane-induced selection on the morphology of an island lizard. *Nature* 560:88–91.
- 497  
498 Donihue CM, Kowaleski AM, Losos JB, Algar AC, Baeckens S, Buchkowski RW, Fabre A-C,  
499 Frank HK, Geneva AJ, Reynolds RG, Stroud JT, Velasco JA, Kolbe JJ, Mahler DL, Herrel A  
500 (2020) Hurricane effects on Neotropical lizards span geographic and phylogenetic scales. *PNAS*  
501 117:10429–10434.
- 502  
503 Dufour CMS, Donihue CM, Losos JB, Herrel A (2019) Parallel increases in grip strength in two  
504 species of *Anolis* lizards after a major hurricane on Dominica. *J Zool* 309:77–83.
- 505  
506 Durso AM, Willson JD, Winne CT (2011) Needles in haystacks: estimating detection probability  
507 and occupancy of rare and cryptic snakes. *Biol Conserv* 144:1508–1515.
- 508  
509 Eppinga MB, Pucko CA (2018) The impact of hurricanes Irma and Maria on the forest ecosystems  
510 of Saba and St. Eustatius, northern Caribbean. *Biotropica* 50:723–728.
- 511  
512 Fiske I, Chandler R (2011) unmarked: An R package for fitting hierarchical models of wildlife  
513 occurrence and abundance. *J Stat Softw* 43:1–23.
- 514  
515 Fogarty SP, Zero VH, Powell R (2004) Revisiting St. Eustatius: estimating the population size of  
516 Lesser Antillean Iguanas, *Iguana delicatissima*. *Iguana* 11:139–146.
- 517  
518 Hall J, Muscarella R, Quebbeman A, Arellano G, Thompson J, Zimmerman JK, Uriarte M (2020)  
519 Hurricane-Induced Rainfall is a Stronger Predictor of Tropical Forest Damage in Puerto Rico Than  
520 Maximum Wind Speeds. *Sci Rep* 10:4318.
- 521  
522 Hayes WK, Carter RL, Cyril Jr S, Thornton B (2004) Conservation of an endangered Bahamian  
523 Rock Iguana, I. Population assessments, habitat restoration, and behavioral ecology. Pp. 232–257 In  
524 *Iguanas: Biology and Conservation*. Alberts AC, Carter RL, Hayes WK, and Martins EP (Eds.).  
525 University of California Press, Berkeley and Los Angeles, California, USA.
- 526  
527 Hayes W, Cyril S, Crutchfield T, Wasilewski J, Rothfus TA, Carter RL (2016) Conservation of the  
528 Endangered San Salvador Rock iguanas (*Cyclura rileyi rileyi*): Population estimation, invasive  
529 species control, translocation, and headstarting. *Herp Conser Biol* 11:90–105.
- 530  
531 Henderson RW, Powell R (2009) Natural history of West Indian reptiles and amphibians.  
532 University of Florida Press, Gainesville, Florida, USA.
- 533  
534 Holthuijsen LH, Powell MD, Pietrzak JD (2012) Wind and waves in extreme hurricanes. *J Geophys*  
535 *Res* 117:C09003.
- 536  
537 Hsu M-H, Lin J-W, Liao C-P, Hsu J-Y, Huang W-S (2021) Trans-marine dispersal inferred from  
538 the saltwater tolerance of lizards from Taiwan. *PLoS ONE* 16:e0247009.
- 539

- 540 Jacobson AP, Riggio J, Tait AM, Baillie JEM (2019) Global areas of low human impact ('Low  
541 Impact Areas') and fragmentation of the natural world. *Sci Rep* 9:14179.  
542
- 543 Johnson AB, Winker K (2010) Short-term hurricane impacts on a neotropical community of marked  
544 birds and implications for early-stage community resilience. *PLoS ONE* 30:e15109.  
545
- 546 Knapp CR, Valerie S (2008) *Iguana delicatissima*. Mortality. *Herpetol Rev* 39:227–228.  
547
- 548 Knapp CR, Perez-Heydrich C (2012) Using non-conspicuous metrics to examine selected impacts  
549 of disturbance on a long-lived reptile. *Endanger Species Res* 17:193–200.  
550
- 551 Knapp CR, Prince L, James A (2016) Movements and nesting of the Lesser Antillean iguana (*Iguana*  
552 *delicatissima*) from Dominica, West Indies: Implications for conservation. Pp. 154–167 In *Iguanas:*  
553 *Biology, Systematics, and Conservation*. Iverson JB, Grant TD, Knapp CR, Pasachnik SA (Eds.).  
554 *Herpetol Conserv Biol* 11 (Monograph 6).  
555
- 556 Knapp CR, Grant TD, Pasachnik S, Angin B, Boman E, Brisbane J, Buckner SD, Haakonsson JE,  
557 Harlow PS, Mukhida F, Thomas-Moko N, van den Burg MP, Wasilewski JA (2020) The global  
558 need to address threats from invasive alien iguanas. *Anim Conserv* ACV12660.  
559 doi:10.1111/acv.12660.  
560
- 561 Liu X, Zeng X, Zou X, González G, Wang C, Yang S (2018) Litterfall Production Prior to and  
562 during Hurricanes Irma and Maria in Four Puerto Rican Forests. *Forests* 9:367.  
563
- 564 Lloyd JD, Rimmer CC, Salguero-Farías JA (2019) Short-term effects of hurricanes Maria and Irma  
565 on forest birds of Puerto Rico. *PLoS ONE* 14:e0214432.  
566
- 567 Lorvelec O, Levesque A, Barré N, Feldmann P, Leblond G, Jaffard M-E, Pascal M, Pavis C (2004)  
568 Evolution de la densité de population de l'iguane des Petites Antilles (*Iguana delicatissima*) dans la  
569 réserve naturelle des Îles de la Petite Terre (Guadeloupe) entre 1995 et 2002. *Revue d'Écologie (La*  
570 *Terre et la Vie)* 59:331–344.  
571
- 572 Losos JB, Schoener TW, Spiller DA (2003) Effect of immersion in seawater on egg survival in the  
573 lizard *Anolis sagrei*. *Oecologia* 137:360–362.  
574
- 575 MacKenzie DI, Nichols JD, Lachman GB, Droege S, Royle JA, Langtimm CA (2002) Estimating  
576 site occupancy rates when detection probabilities are less than one. *Ecol* 83:2248–2255.  
577
- 578 MacKenzie DI, Bailey LL (2004) Assessing the fit of site-occupancy models. *J Agric Biol Environ*  
579 *Stat* 9(3):300–318.  
580
- 581 MacKenzie DI, Nichols JD, Royle JA, Pollock KH, Bailey L, Hines JE (2017) *Occupancy*  
582 *estimation and modeling: inferring patterns and dynamics of species occurrence*. Elsevier,  
583 Amsterdam.  
584
- 585 Madden H, Fernández DS, Tremblay RL, Verdel K, Kaboord B (2021) Find me if you can: Pre- and  
586 Post-hurricane Densities of the Red-bellied Racer (*Alsophis rufiventris*) on St. Eustatius, and a  
587 review of the genus in the Caribbean. bioRxiv. <https://doi.org/10.1101/2021.07.05.451169>  
588

- 589 Madden H (2020) Free-roaming livestock distribution, densities and population estimates on St.  
590 Eustatius: 2020 update. Caribbean Netherlands Science Institute, unpublished report.  
591
- 592 Manes S, Costello MJ, Beckett H, Debnath A, Devenish-Nelson E, Grey K-A, Jenkins R, Ming  
593 Khan T, Kiessling W, Krause C, Maharaj SS, Midgley GF, Price J, Talukdar G, Vale MM (2021)  
594 Endemism increases species' climate change risk in areas of global biodiversity importance,  
595 Biol Conserv 109070, doi:10.1016/j.biocon.2021.109070.  
596
- 597 Marroquin-Paramo JA, Suazo-Ortuno I, Urbina-Cardona N, Benitez-Malvido J (2021) Cumulative  
598 effects of high intensity hurricanes on herpetofaunal assemblages along a tropical dry forest  
599 chronosequence. For Ecol Manag 479:118505.  
600
- 601 McCoid, MJ (1996) Effect of typhoons on the lizard community of a shelf atoll. Atoll Research  
602 Bulletin 439:1–5.  
603
- 604 Meléndez-Vazquez F, Olmeda-Saldana, Cruz J, Arcila D, Betancur R (2019) Effects of Hurricane  
605 Maria in hamlet communities (Serranidae: *Hypoplectrurus* spp.) in Puerto Rico. Ecol Indic  
606 107:105591.  
607
- 608 Meredith M (2020) wqid: Quick and Dirty Estimates for Wildlife Populations. R package version  
609 0.3.0. <https://CRAN.R-project.org/package=wqid>  
610
- 611 Middlebrooks ML, Curtis NE, Pierce SK (2020) The complete disappearance of a long standing  
612 sacoglossan sea slug population following Hurricane Irma, despite recovery of the local algal  
613 community. Symbiosis 80:231–237.  
614
- 615 Morcilo DO, Steiner UK, Grayson KL, Ruiz-Lambides AV, Hernandez-Pacheco R (2020)  
616 Hurricane-induced demographic changes in a nonhuman primate population. R Soc Open Sci  
617 7:200173.  
618
- 619 Murray DL, Sandercock BK (eds.) (2020) *Population ecology in practice*. John Wiley & Sons.  
620
- 621 Neal JW, Haley BM, Moran ZS (2020) Hurricane Maria in Puerto Rico: Effects on Reservoir Water  
622 Quality and Fish Community Structure and Resilience. J Southeastern Association Fish Wildlife  
623 Agencies 7:123–133.  
624
- 625 Neilson EW, Avgar T, Burton AC, Broadley K, Boutin S (2018) Animal movement affects  
626 interpretation of occupancy models from camera-trap surveys of unmarked animals. Ecosphere  
627 9:e02092.  
628
- 629 NOAA (2020) available at [https://www.nhc.noaa.gov/gis/archive\\_besttrack.php?year=2017](https://www.nhc.noaa.gov/gis/archive_besttrack.php?year=2017)  
630
- 631 Palmer CA, Martin TE, Durand S, Lamont M (2018) First observations of the impacts of Hurricane  
632 Maria on the endemic imperial amazon. Oryx 52:410–411.  
633
- 634 Pasachnik SA, Shew JJ, Townsend JH, Powell R (2002) *Iguana delicatissima* (Lesser Antillean  
635 Iguana). Activity. Herpetol Rev 33:51–52.  
636



- 637 Pasachnik SA, Montgomery CE, Ruyle LE, Corneil JP, Antunez EE (2012) Morphological and  
638 demographic analyses of the Black-chested Spiny-tailed iguana, *Ctenosaura melanosterna*, across  
639 their range: Implications for population level management. *Herpetol Conserv Biol* 7:399–406.  
640
- 641 Pounder KC, Mukhida F, Brown RP, Carter D, Daltry JC, Fleming T, Goetz M, Halsey LG, Hughes  
642 G, Questel K, Saccheri IJ, Williams R, Soanes LM (2020) Testing for hybridisation of the Critically  
643 Endangered *Iguana delicatissima* on Anguilla to inform conservation efforts. *Conserv Genet*  
644 21:405–420.  
645
- 646 Powell R (2004) Conservation of iguanas (*Iguana delicatissima* and *I. iguana*) in the Lesser  
647 Antilles. *Iguana* 11:239–246.  
648
- 649 Powers RP, Jetz W (2019) Global habitat loss and extinction risk of terrestrial vertebrates under  
650 future land-use-change scenarios. *Nat Clim Change* 9:323–329.  
651
- 652 R Core Team (2019) A Language and Environment for Statistical Computing. Version 3.5.1.  
653 Available at [www.R-project.org/](http://www.R-project.org/).  
654
- 655 Rabe AM, Herrmann NC, Culbertson KA, Donihue CM, Prado-Irwin SR (2020) Post-hurricane  
656 shifts in the morphology of island lizards. *Biol J Linnean Soc* 130:156–165.  
657
- 658 Reagan DP (1991) The response of *Anolis* lizards to hurricane-induced habitat changes in a Puerto  
659 Rican rain forest. *Biotropica* 23:468–474.  
660
- 661 River-Milan FF, Madden H, Verdel K (2021) Bridled Quail-dove *Geotrygon mystacea* population  
662 assessment after hurricanes Irma and Maria, St. Eustatius, Caribbean Netherlands. *Bird Conserv Int*  
663 1–12.  
664
- 665 Rojer AC (1997) Biological inventory of Sint Eustatius. KNAP-Project 96-10. Report, CARMABI  
666 Foundation, Curaçao, Netherlands Antilles. 50 pp.  
667
- 668 Royle JA, Nichols JD (2003) Estimating abundance from repeated presence–absence data or point  
669 counts. *Ecology* 84:777–790.  
670
- 671 Royle JA (2004) N-mixture models for estimating population size from spatially replicated counts.  
672 *Biometrics* 60:108–115.  
673
- 674 Schoener TW, Spiller DA, Losos JB (2001) Natural restoration of the species-area relation for a  
675 lizard after a hurricane. *Science* 294:1525–1528.  
676
- 677 Schoener TW, Spiller DA, Losos JB (2004) Variable ecological effects of hurricanes: The  
678 importance of seasonal timing for survival of lizards on Bahamian islands. *PNAS* 101:177–181.  
679
- 680 Schriever, TA, Ramspott, J, Crother, BI, Fontenot, CL (2009) Effects of hurricanes Ivan, Katrina,  
681 and Rita on a southeastern Louisiana herpetofauna. *Wetlands* 29(1):112–122.  
682

- 683 Schultz JMM, Kossin JP, Shepherd JM, Ransdell JM, Walshe R, Kelman I, Galea S (2018) Risks,  
684 health consequences, and response challenges for small-island-based populations: Observations  
685 from the 2017 Atlantic hurricane season. *Disaster Med Public Health Prep* 13:5–17.  
686
- 687 Selman W (2015) Herpetofaunal diversity and seasonality from a remnant coastal chenier forest in  
688 southwestern Louisiana. *Southeastern Naturalist* 14(3):491–505.  
689
- 690 Sewell D, Guillera-Aroita G, Griffiths RA, Beebee TJ (2012) When is a species declining?  
691 Optimizing survey effort to detect population changes in reptiles. *PLoS ONE* 7:e43387.  
692
- 693 Spiller DA, Losos JB, Schoener TW (1998) Impact of a catastrophic hurricane on island  
694 populations. *Science* 281:695–697.  
695
- 696 Statistics Netherlands (2020) Statistics Netherlands, available at <https://www.cbs.nl/en-gb>.  
697
- 698 Trewartha GT, Horn LH (1980) *An Introduction to climate*. McGraw-Hill, New York.  
699
- 700 van Andel T, van der Hoorn B, Stech M, Bantjes Arostegui S, Miller J (2016) A quantitative  
701 assessment of the vegetation types on the island of St. Eustatius, Dutch Caribbean. *Global Ecol*  
702 *Conserv* 7:59–69.  
703
- 704 van Buurt G (2010) A Short Natural History of Curaçao. In: *Crossing Shifting Boundaries,*  
705 *Language and Changing Political status in Aruba, Bonaire and Curaçao*. Proceedings of the ECICC-  
706 conference, Dominica 2009, Volume I, pp. 229-256. Faraclas, N., Severing, R., Weijer, C. Echteld,  
707 E. (Eds.), FPI and UNA, Curaçao.  
708
- 709 van den Burg M, Breuil M, Knapp C (2018a) *Iguana delicatissima*. The IUCN Red List of  
710 Threatened Species 2018: e.T10800A122936983. [https://dx.doi.org/10.2305/IUCN.UK.2018-](https://dx.doi.org/10.2305/IUCN.UK.2018-1.RLTS.T10800A122936983.en)  
711 [1.RLTS.T10800A122936983.en](https://dx.doi.org/10.2305/IUCN.UK.2018-1.RLTS.T10800A122936983.en)  
712
- 713 van den Burg MP, Meirmans PG, van Wagensveld TP, Kluskens B, Madden H, Welch ME,  
714 Breeuwer JAJ (2018b) The Lesser Antillean Iguana (*Iguana delicatissima*) on St. Eustatius:  
715 genetically depauperate and threatened by ongoing hybridization. *J Hered* 109:426–437.  
716
- 717 van den Burg MP, Madden H, van Wagensveld TP, Buma C (2018c) Anthropogenic mortality in  
718 the Critically Endangered Lesser Antillean iguana (*Iguana delicatissima*) on St. Eustatius. *IRCF*  
719 *Reptiles & Amphibians* 25:120–124.  
720
- 721 van den Burg MP, Brisbane JLK, Knapp CR (2020) Post-hurricane relief facilitates invasion and  
722 establishment of two invasive alien vertebrate species in the Commonwealth of Dominica, West  
723 Indies. *Biol Invasions* 22:195–203.  
724
- 725 van Wagensveld TP, van den Burg MP (2018) First record on fecundity of an *Iguana* hybrid and its  
726 implications for conservation: evidence for genetic swamping by non-native iguanas. *Herpetology*  
727 *Notes* 11:1079–1082.  
728

- 729 Vuillaume B, Valette V, Lepais O, Grandjean F, Breuil M (2015) Genetic evidence of hybridization  
730 between the endangered native species *Iguana delicatissima* and the invasive *Iguana iguana*  
731 (Reptilia, Iguanidae) in the Lesser Antilles: management implications. PLoS ONE 10:e0127575.  
732
- 733 Walcker R, Laplanche C, Herteman M, Lambs L, Fromard F (2019) Damages caused by hurricane  
734 Irma in the human-degraded mangroves of Saint Martin (Caribbean). Sci Rep 9:18971.  
735
- 736 Webster PJ, Holland GJ, Curry JA, Chang H-R (2005) Changes in tropical cyclone number,  
737 duration, and intensity in a warming environment. Science 309:1844–1846.  
738
- 739 Wiley JW, Wunderle JM (1993) The effects of hurricanes on birds, with special reference to  
740 Caribbean islands. Bird Conserv Int 3:319–349.  
741

742 **Electronic Supplementary Material**

743

744 **List of figures and table in this document**

745

746 **Figure S1. The effect of elevation on site occupancy estimates of *Iguana delicatissima* based on**  
747 **transect surveys conducted on St. Eustatius in 2017 (pre-hurricane), 2018 and 2019 (post-**  
748 **hurricane). Data obtained using R package *unmarked*.**

749

750 **Figure S2. The effect of elevation on abundance estimates of *Iguana delicatissima* based on**  
751 **transect surveys conducted on St. Eustatius in 2017 (pre-hurricane), 2018 and 2019 (post-**  
752 **hurricane). Data obtained using R package *unmarked*.**

753

754 **Figure S3. Iguana density heatmap for opportunistically observed bead-tagged iguanas on St.**  
755 **Eustatius, during 2017–2019.**

756

757 **Table S1. Overview of 2017–2019 site occupancy estimates per habitat of *Iguana delicatissima***  
758 **on St. Eustatius.  $\psi$  presents the probability of a site to be occupied, including lower and upper**  
759 **confidence intervals (CI). Habitat following De Freitas et al. (2012): 1 = *Pisonia - Antirhea***  
760 **mountains; 2 = miscellaneous urban/agricultural or disturbed land; 3 = *Pisonia - Justicia* hills; 4 =**  
761 ***Capparis - Pisonia* mountains; 5 = *Rauvolfia - Antigonon* mountains; 6 = *Coccoloba - Bothriochloa***  
762 **cliffs; 7 = *Pisonia - Eugenia* mountains; 8 = *Chionanthus - Nectandra* mountains.**

763

764

765 Mean detection probability ( $p$ ) per transect was 0.01 (inestimable CIs) using “unmarked”.  
766 Occupancy probability was 33.1% (11.4–73.8%) in 2018, and 37.5% (19.4–64.0%) in 2019.  
767  $p$  was 0.40 (0.12–1.34) in 2018, and 0.47 (0.22–1.02) as estimated using “unmarked”.

768

769

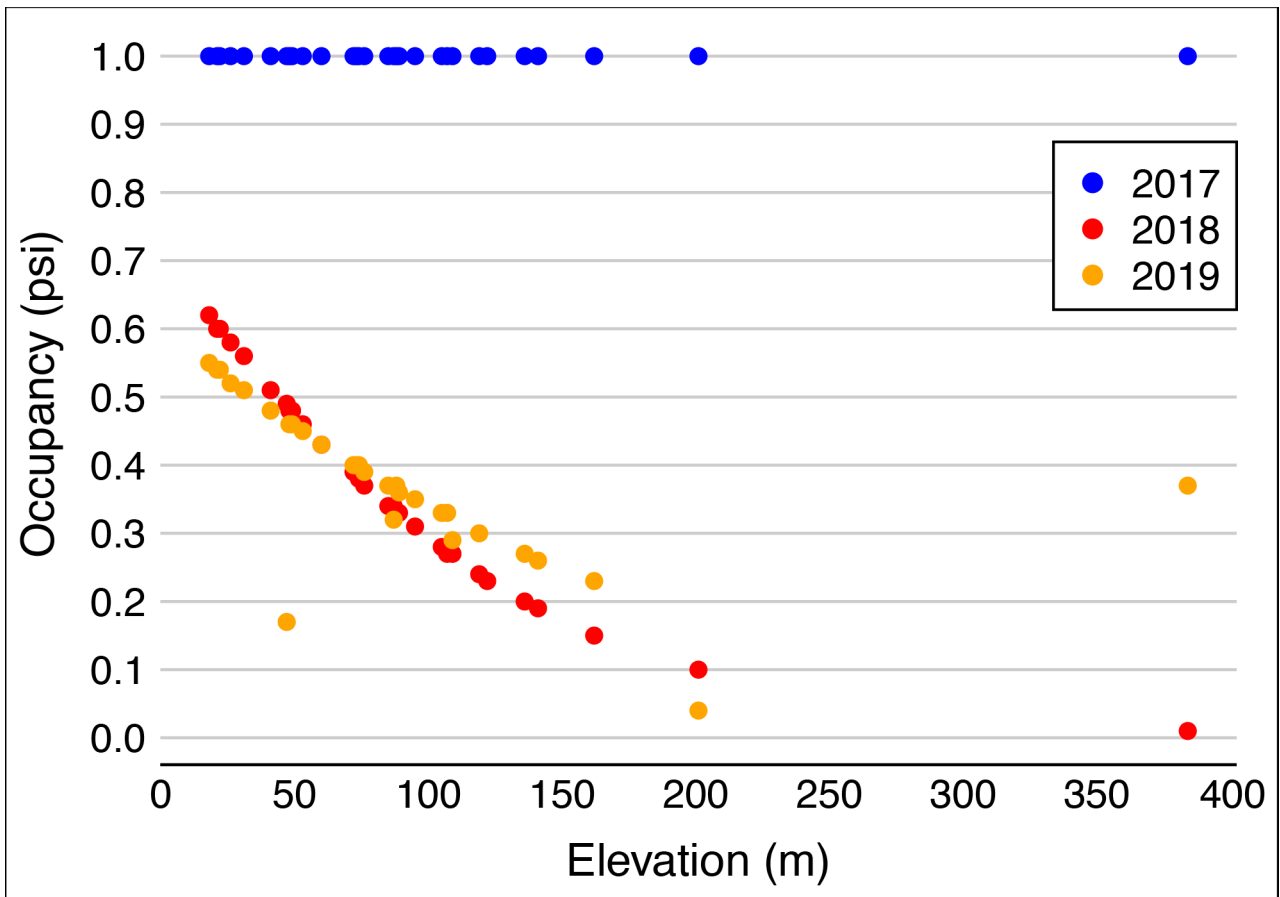

770  
771  
772  
773  
774

Figure S1. The effect of elevation on site occupancy estimates of *Iguana delicatissima* based on transect surveys conducted on St. Eustatius in 2017 (pre-hurricane), 2018 and 2019 (post-hurricane). Data obtained using R package *unmarked*.

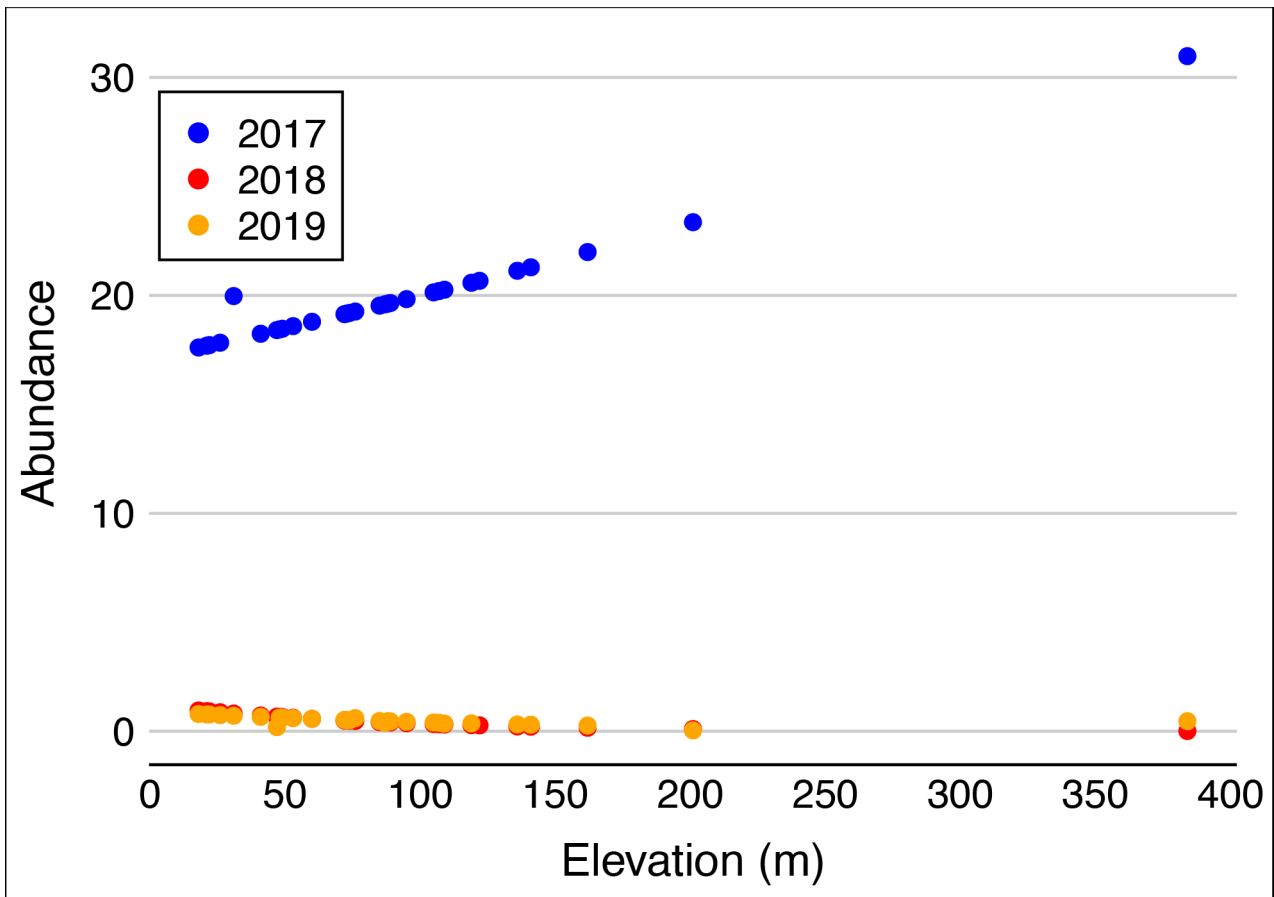

775  
776  
777  
778  
779

**Figure S2. The effect of elevation on abundance estimates of *Iguana delicatissima* based on transect surveys conducted on St. Eustatius in 2017 (pre-hurricane), 2018 and 2019 (post-hurricane). Data obtained using R package *unmarked*.**

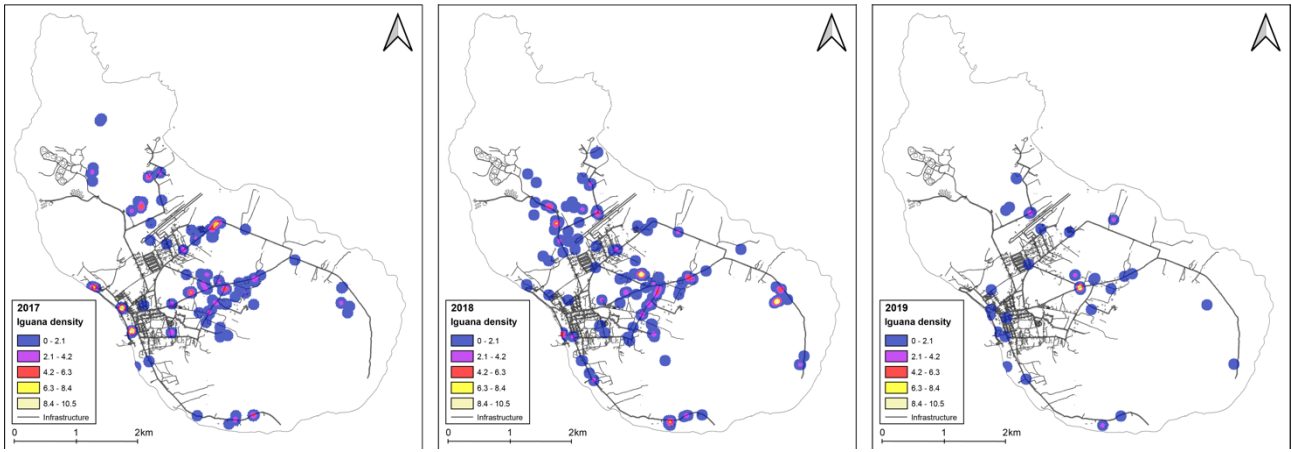

780

781

782

783

784

785

**Figure S3. Iguana density heatmap for opportunistically observed iguanas on St. Eustatius, during 2017–2019.** Radius for heatmap analyses was 100m. Total number of iguanas sighted per year; 184 (2017), 208 (2018), 51 (2019).

786 **Table S1. Overview of 2017–2019 site occupancy estimates per habitat of *Iguana delicatissima***  
 787 **on St. Eustatius.**  $\psi$  presents the probability of a site to be occupied, including lower and upper  
 788 confidence intervals (CI). Habitat following De Freitas et al. (2012): 1 = *Pisonia - Antirhea*  
 789 mountains; 2 = miscellaneous urban/agricultural or disturbed land; 3 = *Pisonia - Justicia* hills; 4 =  
 790 *Capparis - Pisonia* mountains; 5 = *Rauvolfia - Antigonon* mountains; 6 = *Coccoloba - Bothriochloa*  
 791 cliffs; 7 = *Pisonia - Eugenia* mountains; 8 = *Chionanthus - Nectandra* mountains.  
 792

| Year | Habitat | $\psi$ | low CI | upp CI | Year | Habitat | $\psi$ | low CI | upp CI |
|------|---------|--------|--------|--------|------|---------|--------|--------|--------|
| 2017 | 1       | 1.00   | <0.001 | 1.00   | 2018 | 5       | 0.31   | 0.09   | 0.77   |
| 2017 | 2       | 1.00   | <0.001 | 1.00   | 2018 | 6       | 0.30   | 0.07   | 0.82   |
| 2017 | 3       | 1.00   | <0.001 | 1.00   | 2018 | 7       | 0.28   | 0.05   | 0.88   |
| 2017 | 4       | 1.00   | <0.001 | 1.00   | 2018 | 8       | 0.26   | 0.03   | 0.94   |
| 2017 | 5       | 1.00   | <0.001 | 1.00   | 2019 | 1       | 0.36   | 0.14   | 0.74   |
| 2017 | 6       | 1.00   | <0.001 | 1.00   | 2019 | 2       | 0.37   | 0.17   | 0.67   |
| 2017 | 7       | 1.00   | <0.001 | 1.00   | 2019 | 3       | 0.37   | 0.19   | 0.64   |
| 2017 | 8       | 1.00   | <0.001 | 1.00   | 2019 | 4       | 0.38   | 0.19   | 0.67   |
| 2018 | 1       | 0.39   | 0.08   | 0.94   | 2019 | 5       | 0.39   | 0.16   | 0.75   |
| 2018 | 2       | 0.37   | 0.10   | 0.87   | 2019 | 6       | 0.39   | 0.13   | 0.84   |
| 2018 | 3       | 0.35   | 0.11   | 0.80   | 2019 | 7       | 0.40   | 0.10   | 0.92   |
| 2018 | 4       | 0.33   | 0.11   | 0.76   | 2019 | 8       | 0.41   | 0.07   | 0.97   |

793  
 794  
 795
